# Supplementary material for: Solid Dispersion of Resveratrol Supported on Magnesium DiHydroxide (Resv@MDH) Microparticles Improves Oral Bioavailability
Source: PubMed Central journal article supplement (PMC6315708; doi:10.3390/nu10121925), 2018-12-05

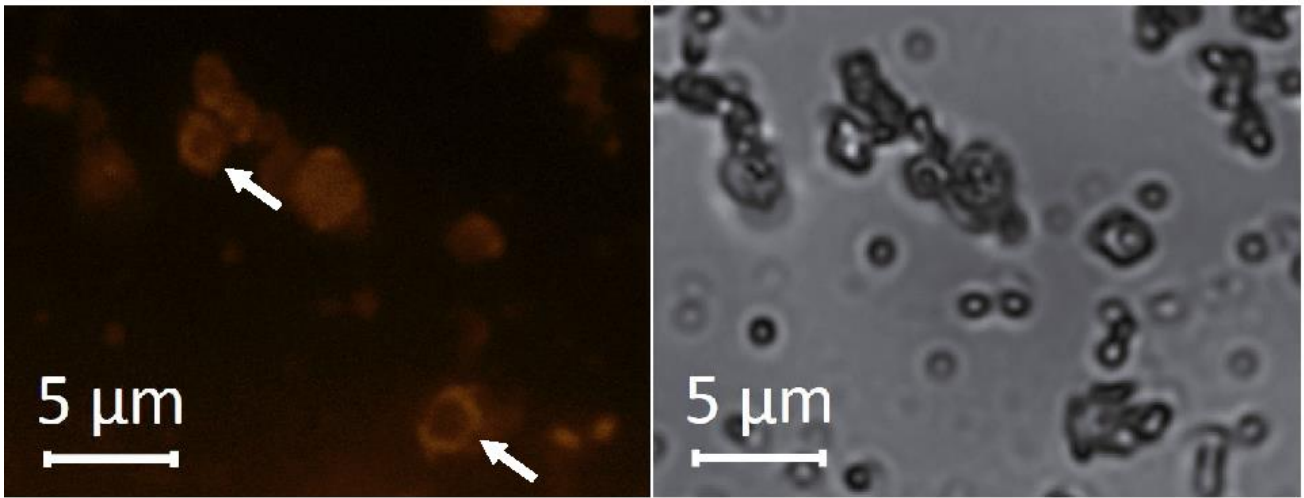

**Supplemental Figure 1:** Image of RESV@MDH powder dispersed in glycerol under different excitation sources. (A) Rohdamine fluorescence filter (B) brightfield; Note: white arrow indicates the fluorescent shell of resveratrol around the core of magnesium dihydroxide.

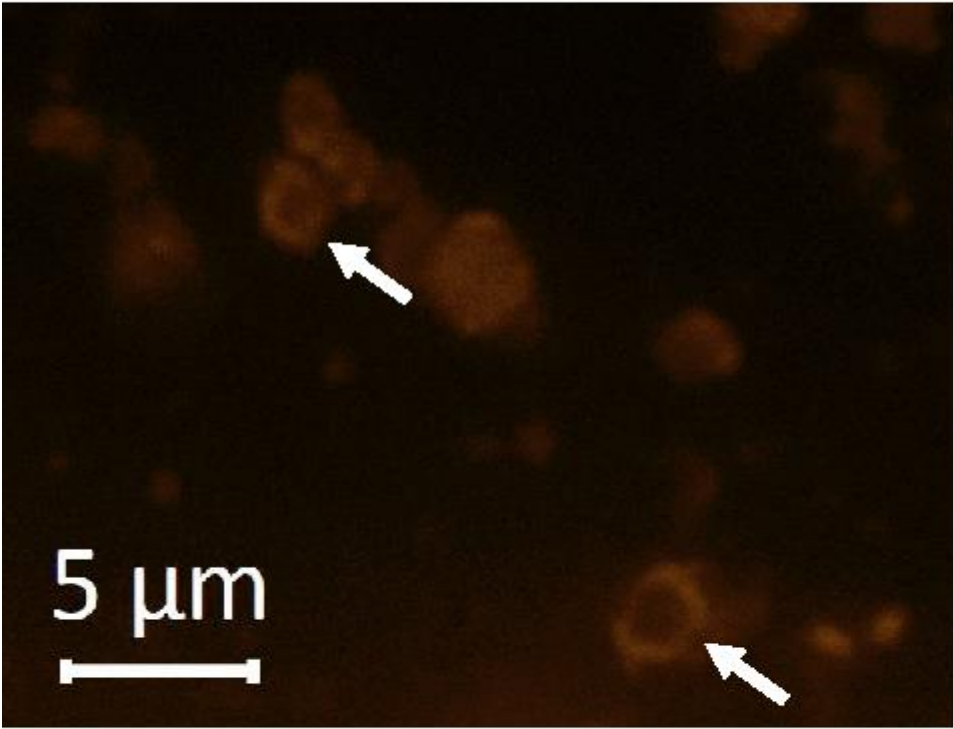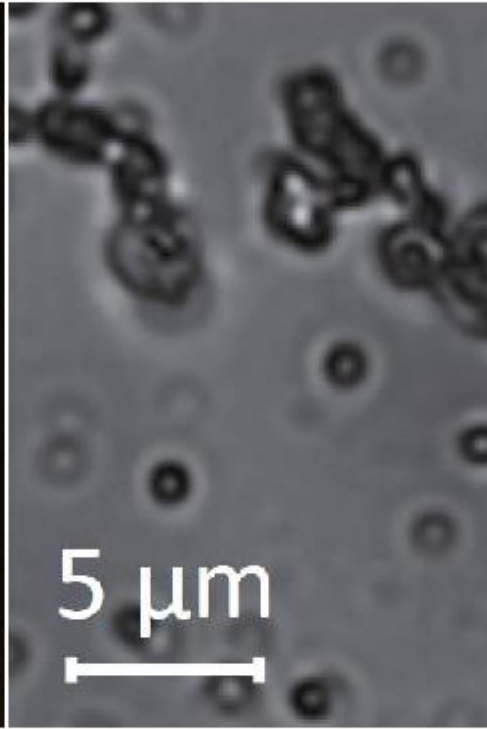

Supplement: nutrients-10-01925-s001.pdf [file nutrients-10-01925-s001.pdf]
